# Supplementary material for: Zebrafish AID is capable of deaminating methylated deoxycytidines
Source: PubMed Central journal article supplement — Nucleic Acids Res. 2013 Apr 12;41(10):5457–68. doi: 10.1093/nar/gkt212 (PMC3664802; doi:10.1093/nar/gkt212), 2013-04-12
Supplement: supp_gkt212_nar-02880-v-2012-File001.pdf [file supp_gkt212_nar-02880-v-2012-File001.pdf]

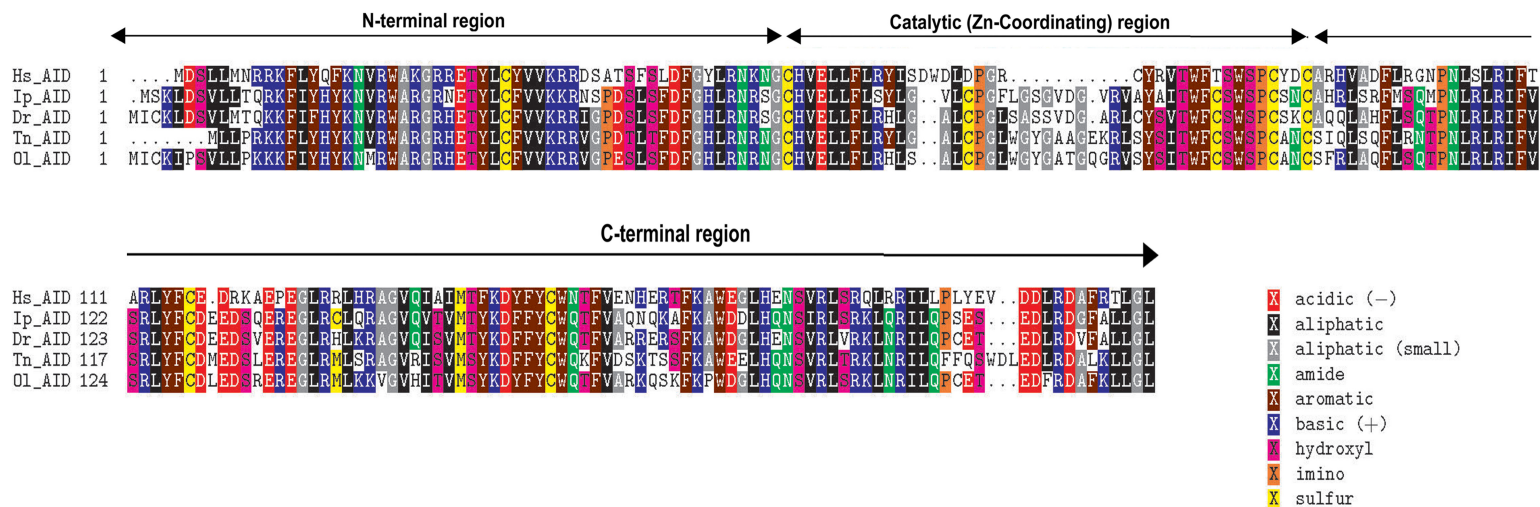

A.

Hs-AID

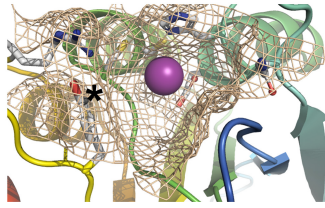

Dr-AID

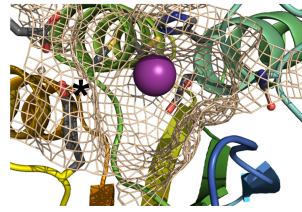

B.

Hs-AID

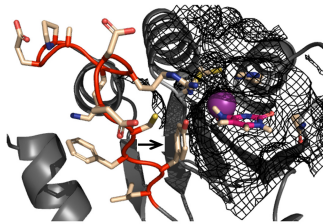

Dr-AID

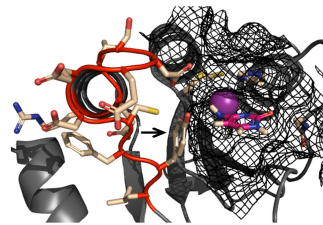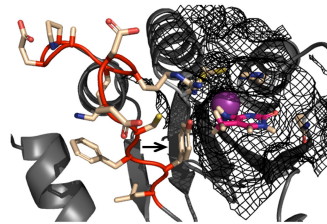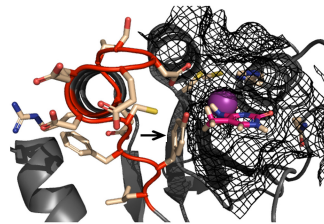

Hs-AID

C.

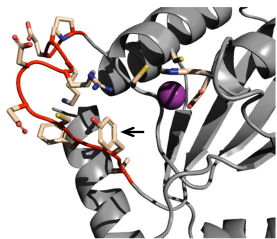

Dr-AID

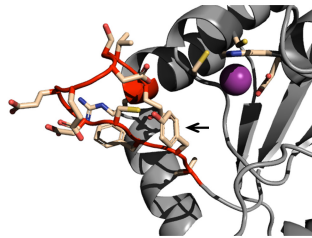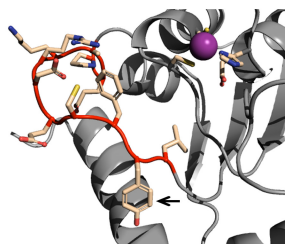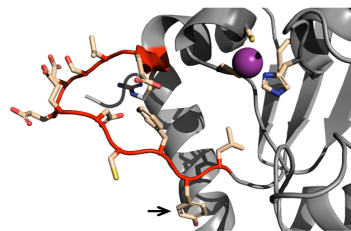

## Supplementary Figure legends:

**Supplementary Figure 1.** Comparison of the primary structure of AID from human and four bony fish. Residues are colored according to side-chain. Blue, green and red underlines indicate identical, similar and unlike residues. Arrows denote the borders of the catalytic domain. Sequence alignment based on published sequences of AID (Homo sapiens: AAM95406.1, Danio rerio: NP001008403, Ictalurus punctatus: AAR97544) and based on unpublished sequences (Oryzias latipes and Tetradon nigroviridis).

**Supplementary Figure 2.** (A) Combination ribbon and mesh model of Hs-AID (left panel) and Dr-AID (right panel), showing the position of Y114 in Hs-AID and its equivalent residue in Dr-AID (Y126) relative to the catalytic pocket. Positions of Y114 and 126 are indicated by \*. (B). Combination mesh and ribbon diagram of Hs-AID (left panel) and Dr-AID (right panel) with C (top row) or mC (bottom row) docked into the catalytic pocket, showing proximity to Y114 (Hs-AID) and Y126 (Dr-AID). The backbone of the flexible loop (in Hs-AID: L113-P123, in Dr-AID: L125-R136) containing the tyrosine residue is colored in red. Arrows denote the position of Y114 and 126. (C). Comparison of the relative positions of Y114 in Hs-AID and Y126 in Dr-AID between models based on the X-ray determined structure of APOBEC3G catalytic unit (top row), or its NMR-determined structure (bottom row). Comparison of the top and bottom row reveals a high probability of significant breathing of Y114 and Y126. Arrows denote the position of Y114 and 126.
